# Supplementary material for: Alkali halide flux synthesis, crystal structure, and photoelectric response of quaternary thiosilicates K3Ga3Si7S20 and K2ZnSi3S8
Source: Royal Society of Chemistry journal article supplement (doi:10.1039/d3ce00960b), 2024-01-01
Supplement: d3ce00960b1.pdf [file d3ce00960b1.pdf]

## Supporting Information:

### **Alkali Halide Flux Synthesis, Crystal Structure, and Photoelectric Response of Quaternary Thiosilicates $K_3Ga_3Si_7S_{20}$ and $K_2ZnSi_3S_8$**

Jia-Ting Liu,<sup>a,b</sup> Abdusalam Ablez,<sup>a,b</sup> Qian-Qian Hu,<sup>b</sup> Jun-Hao Tang,<sup>b</sup> Chuan Lv,<sup>c</sup> Lu Yang,<sup>a</sup> Mei-Ling Feng<sup>b,\*</sup> and Xiao-Ying Huang<sup>b,\*</sup>

<sup>a</sup> College of Chemistry, Fuzhou University, Fuzhou 350116, Fujian, China

Email: [fml@fjirsm.ac.cn](mailto:fml@fjirsm.ac.cn); [xyhuang@fjirsm.ac.cn](mailto:xyhuang@fjirsm.ac.cn)

<sup>b</sup>State Key Laboratory of Structural Chemistry, Fujian Institute of Research on the Structure of Matter, Chinese Academy of Sciences, Fuzhou, Fujian 350002, China.

<sup>c</sup> College of Chemistry, Sichuan University, Chengdu 610064, China.

## 1. Synthesis Procedures

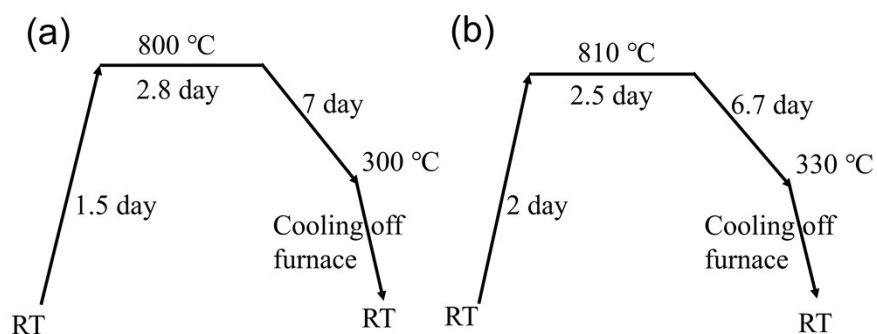

Figure S1 Synthetic temperature control roadmaps for 1 (a) and 2 (b).

## 2. Supporting Figures

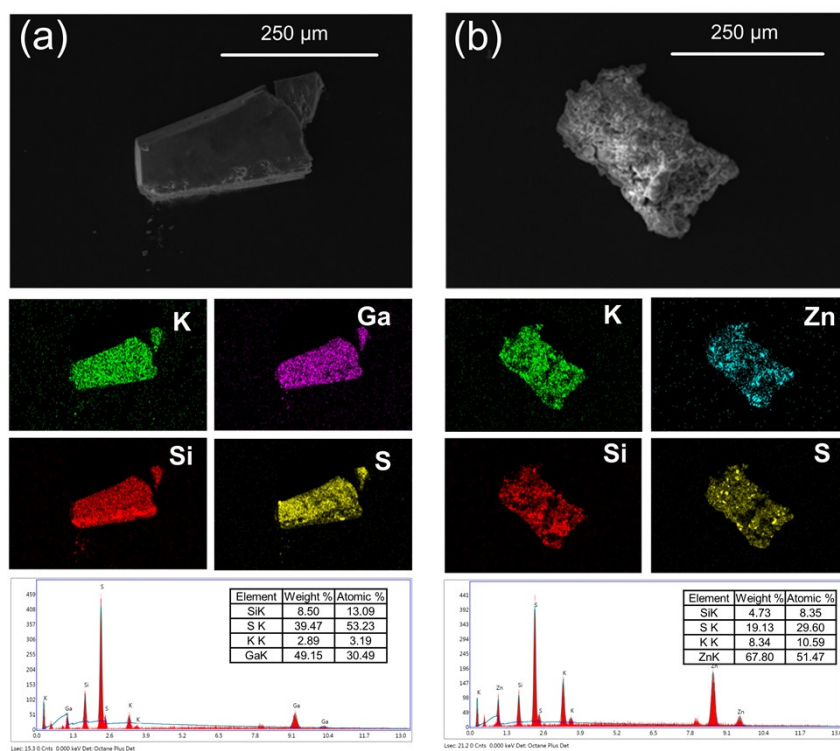

Figure S2 SEM images of 1 (a) and 2 (b) and their elemental distribution maps and the EDS results of 1 and 2.

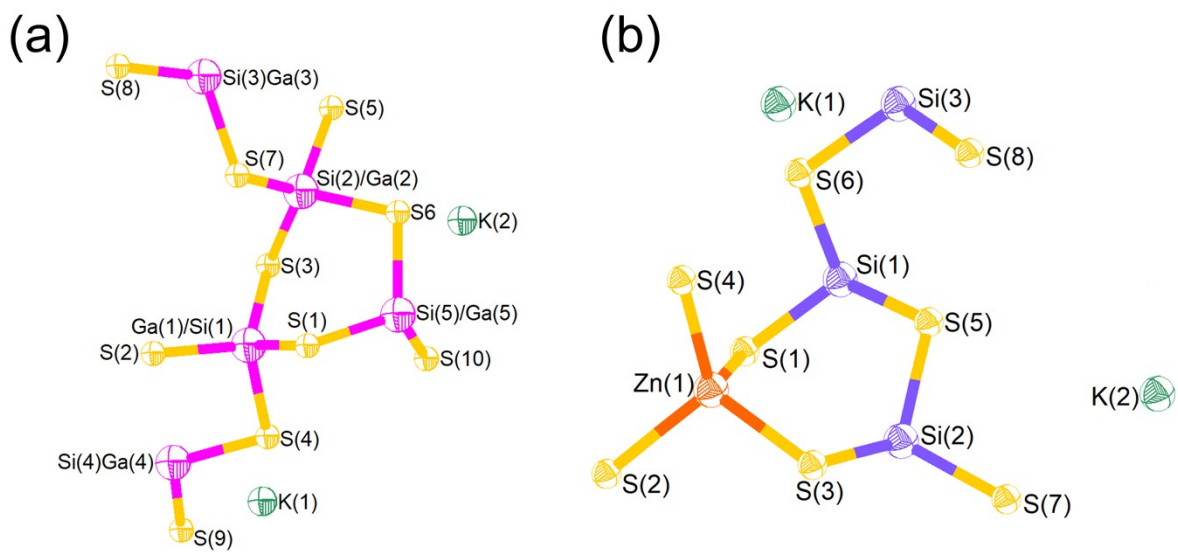

**Figure S3** ORTEP drawings (50% ellipsoid probability) of the asymmetric units of **1** (a) at 296 K and **2** (b) at 297 K.

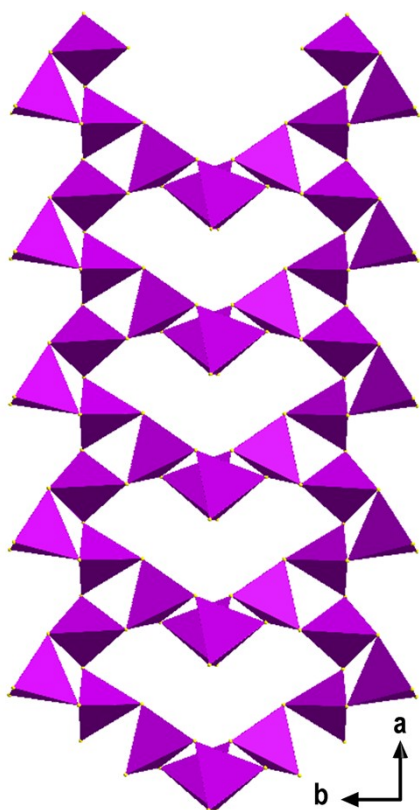

**Figure S4** A 1-D band in **1** viewed along the *c*-axis.

### 3. X-ray Crystallography

**Table S1** Crystallographic data and structural refinement details for **1** and **2**.

| Empirical formula                           | K <sub>3</sub> Ga <sub>3</sub> Si <sub>7</sub> S <sub>20</sub>     | K <sub>2</sub> ZnSi <sub>3</sub> S <sub>8</sub>                     |
|---------------------------------------------|--------------------------------------------------------------------|---------------------------------------------------------------------|
| $F_w$                                       | 1164.29                                                            | 484.32                                                              |
| $a$ (Å)                                     | 6.6732                                                             | 6.9955                                                              |
| $b$ (Å)                                     | 36.810                                                             | 7.4508                                                              |
| $c$ (Å)                                     | 6.6191                                                             | 14.2302                                                             |
| $\alpha$ (°)                                | 90.0                                                               | 87.204                                                              |
| $\beta$ (°)                                 | 90.946                                                             | 81.546                                                              |
| $\gamma$ (°)                                | 90.0                                                               | 69.495                                                              |
| Space group                                 | $P2_1/c$                                                           | $P\bar{1}$                                                          |
| $V$ (Å <sup>3</sup> )                       | 1625.7                                                             | 687.16                                                              |
| $Z$                                         | 2                                                                  | 2                                                                   |
| $\theta$ range (°)                          | 3.480 to 29.657                                                    | 3.588 to 29.588                                                     |
| $\rho_{\text{calcd}}$ (g/cm <sup>3</sup> )  | 2.379                                                              | 2.341                                                               |
| $\mu$ (MoK $\alpha$ ) / (mm <sup>-1</sup> ) | 4.401                                                              | 3.826                                                               |
| Crystal size (mm <sup>3</sup> )             | 0.200 × 0.200 × 0.150                                              | 0.150 × 0.150 × 0.100                                               |
| $\lambda$ (MoK $\alpha$ ) (Å)               | 0.71073                                                            | 0.71073                                                             |
| Temperature (K)                             | 296                                                                | 297                                                                 |
| Total/independent reflections               | 11559 / 3901                                                       | 6921 / 3252                                                         |
| Reflections with $I > 2\sigma(I)$           | $R_1 = 0.0549, wR_2 = 0.0955$                                      | $R_1 = 0.0572, wR_2 = 0.1154$                                       |
| $R_1^a/wR_2^b$                              | $R_1 = 0.0967, wR_2 = 0.1117$                                      | $R_1 = 0.0818, wR_2 = 0.1289$                                       |
| Goodness of fit                             | 1.044                                                              | 1.122                                                               |
| Index ranges                                | $-8 \leq h \leq 9,$<br>$-47 \leq k \leq 46,$<br>$-7 \leq l \leq 8$ | $-8 \leq h \leq 8,$<br>$-10 \leq k \leq 9,$<br>$-19 \leq l \leq 17$ |
| $F(000)$                                    | 1136                                                               | 476                                                                 |

$$^aR_1 = \Sigma||F_o| - |\Sigma|F_o|. ^b wR_2 = [w(|F_o|^2 - F_c)^2 / \Sigma w(|F_o|^2)]^{1/2}.$$

**Table S2** Selected bond lengths (Å) and angles (°) for **1** and **2**.

| Compound 1              |            |                              |            |
|-------------------------|------------|------------------------------|------------|
| <i>M</i> (1)-S(3)       | 2.2041(18) | <i>M</i> (5)-S(2)#5          | 2.121(2)   |
| <i>M</i> (1)-S(1)       | 2.2260(17) | <i>M</i> (5)-S(1)            | 2.125(2)   |
| <i>M</i> (1)-S(2)       | 2.228(2)   | <i>M</i> (5)-S(10)           | 2.145(2)   |
| <i>M</i> (1)-S(4)       | 2.2420(17) | <i>M</i> (5)-S(6)            | 2.1569(19) |
| <i>M</i> (2)-S(3)       | 2.1436(19) | S(1)-K(1)                    | 3.3667(16) |
| <i>M</i> (2)-S(7)       | 2.155(2)   | S(2)-K(2)#7                  | 3.663(3)   |
| <i>M</i> (2)-S(5)       | 2.1553(19) | S(3)-K(2)#3                  | 3.606(3)   |
| <i>M</i> (2)-S(6)       | 2.195(2)   | S(4)-K(1)                    | 3.5042(19) |
| <i>M</i> (3)-S(5)#1     | 2.1563(19) | S(5)-K(2)                    | 3.762(3)   |
| <i>M</i> (3)-S(8)       | 2.165(2)   | S(6)-K(2)#6                  | 3.322(3)   |
| <i>M</i> (3)-S(8)#2     | 2.1664(19) | S(6)-K(2)                    | 3.359(3)   |
| <i>M</i> (3)-S(7)       | 2.1812(18) | S(7)-K(2)#6                  | 3.704(3)   |
| <i>M</i> (4)-S(4)       | 2.132(2)   | S(7)-K(2)#7                  | 3.758(3)   |
| <i>M</i> (4)-S(10)#3    | 2.145(2)   | S(8)-K(2)#7                  | 3.285(3)   |
| <i>M</i> (4)-S(9)       | 2.152(2)   | S(9)-K(1)#8                  | 3.6138(19) |
| <i>M</i> (4)-S(9)#4     | 2.167(2)   | S(10)-K(2)                   | 3.364(3)   |
| S(3)- <i>M</i> (1)-S(1) | 115.15(7)  | S(5)#1- <i>M</i> (3)-S(8)    | 115.91(8)  |
| S(3)- <i>M</i> (1)-S(2) | 120.64(7)  | S(5)#1- <i>M</i> (3)-S(8)#2  | 117.04(8)  |
| S(1)- <i>M</i> (1)-S(2) | 96.31(7)   | S(8)- <i>M</i> (3)-S(8)#2    | 100.39(8)  |
| S(3)- <i>M</i> (1)-S(4) | 106.70(7)  | S(5)#1- <i>M</i> (3)-S(7)    | 106.13(8)  |
| S(1)- <i>M</i> (1)-S(4) | 108.69(7)  | S(8)- <i>M</i> (3)-S(7)      | 106.05(8)  |
| S(2)- <i>M</i> (1)-S(4) | 108.68(7)  | S(8)#2- <i>M</i> (3)-S(7)    | 110.88(8)  |
| S(3)- <i>M</i> (2)-S(7) | 113.11(9)  | S(4)- <i>M</i> (4)-S(10)#3   | 113.36(8)  |
| S(3)- <i>M</i> (2)-S(5) | 110.02(8)  | S(4)- <i>M</i> (4)-S(9)      | 108.87(9)  |
| S(7)- <i>M</i> (2)-S(5) | 117.14(8)  | S(10)#3- <i>M</i> (4)-S(9)   | 108.31(8)  |
| S(3)- <i>M</i> (2)-S(6) | 112.01(8)  | S(4)- <i>M</i> (4)-S(9)#4    | 113.57(9)  |
| S(7)- <i>M</i> (2)-S(6) | 108.40(8)  | S(10)#3- <i>M</i> (4)-S(9)#4 | 113.48(9)  |
| S(5)- <i>M</i> (2)-S(6) | 94.75(8)   | S(9)- <i>M</i> (4)-S(9)#4    | 97.92(8)   |

(*M* = 0.3 Ga + 0.7 S.)

| Compound 2   |            |             |          |
|--------------|------------|-------------|----------|
| Zn(1)-S(1)   | 2.3141(19) | S(2)-K(2)#1 | 3.319(2) |
| Zn(1)-S(4)   | 2.332(2)   | S(2)-K(1)#2 | 3.336(3) |
| Zn(1)-S(2)   | 2.3364(17) | S(2)-K(2)#6 | 3.431(2) |
| Zn(1)-S(3)   | 2.3540(19) | S(3)-K(2)#2 | 3.145(2) |
| Zn(1)-K(2)#1 | 3.8702(18) | S(3)-K(2)#1 | 3.358(3) |
| Zn(1)-K(1)#2 | 4.011(2)   | S(3)-K(1)#7 | 3.733(3) |
| Si(1)-S(1)   | 2.078(2)   | S(4)-K(1)#8 | 3.445(3) |
| Si(1)-S(2)#3 | 2.090(2)   | S(4)-K(1)#7 | 3.536(3) |
| Si(1)-S(6)   | 2.154(2)   | S(5)-K(1)#7 | 3.740(3) |
| Si(1)-S(5)   | 2.171(3)   | S(6)-K(1)   | 3.691(3) |

|                   |            |                     |            |
|-------------------|------------|---------------------|------------|
| Si(2)-S(3)        | 2.065(2)   | S(7)-K(2)           | 3.379(2)   |
| Si(2)-S(5)        | 2.114(2)   | S(7)-K(2)#9         | 3.389(3)   |
| Si(2)-S(7)#1      | 2.156(3)   | S(7)-K(2)#2         | 3.705(2)   |
| Si(2)-S(7)        | 2.163(2)   | S(8)-K(1)#10        | 3.581(3)   |
| Si(3)-S(4)#3      | 2.063(3)   | S(8)-K(1)#7         | 3.593(3)   |
| Si(3)-S(6)        | 2.130(2)   | K(1)-K(1)#11        | 4.817(4)   |
| Si(3)-S(8)#4      | 2.146(2)   | K(2)-K(2)#12        | 4.018(3)   |
| Si(3)-S(8)        | 2.158(3)   | K(2)-K(2)#13        | 4.330(4)   |
| Si(3)-Si(3)#4     | 2.822(4)   | K(2)-K(2)#9         | 4.972(3)   |
| S(1)-K(2)#5       | 3.179(3)   |                     |            |
| <hr/>             |            |                     |            |
| S(1)-Zn(1)-S(4)   | 108.52(7)  | S(3)-Si(2)-S(5)     | 114.27(11) |
| S(1)-Zn(1)-S(2)   | 102.94(7)  | S(3)-Si(2)-S(7)#1   | 115.89(10) |
| S(4)-Zn(1)-S(2)   | 114.97(7)  | S(5)-Si(2)-S(7)#1   | 112.19(11) |
| S(1)-Zn(1)-S(3)   | 109.27(7)  | S(3)-Si(2)-S(7)     | 110.07(11) |
| S(4)-Zn(1)-S(3)   | 113.55(8)  | S(5)-Si(2)-S(7)     | 106.41(9)  |
| S(2)-Zn(1)-S(3)   | 106.99(7)  | S(7)#1-Si(2)-S(7)   | 96.02(9)   |
| S(1)-Si(1)-S(2)#3 | 108.01(11) | S(4)#3-Si(3)-S(6)   | 116.14(12) |
| S(1)-Si(1)-S(6)   | 107.15(9)  | S(4)#3-Si(3)-S(8)#4 | 110.37(10) |
| S(2)#3-Si(1)-S(6) | 111.09(10) | S(6)-Si(3)-S(8)#4   | 104.23(10) |
| S(1)-Si(1)-S(5)   | 114.92(10) | S(4)#3-Si(3)-S(8)   | 113.16(11) |
| S(2)#3-Si(1)-S(5) | 110.53(10) | S(6)-Si(3)-S(8)     | 112.89(10) |
| S(6)-Si(1)-S(5)   | 105.11(10) | S(8)#4-Si(3)-S(8)   | 98.06(10)  |

Symmetry transformations used to generate equivalent atoms for **1**: #1  $x, -y+1/2, z-1/2$ ; #2  $x, -y+1/2, z+1/2$ ; #3  $x+1, y, z$ ; #4  $-x+2, -y, -z+1$ ; #5  $x-1, y, z$ ; #6  $x, y, z-1$ ; #7  $x+1, y, z-1$ ; #8  $x, y, z+1$ ; #9  $-x+1, -y, -z$ ; #10  $-x+1, -y, -z+1$ ; #11  $x-1, y, z+1$ .

Symmetry transformations used to generate equivalent atoms for **2**: #1  $-x+1, -y+2, -z+1$ ; #2  $x-1, y, z$ ; #3  $x+1, y, z$ ; #4  $-x+2, -y+2, -z$ ; #5  $x, y-1, z$ ; #6  $x-1, y-1, z$ ; #7  $x-1, y+1, z$ ; #8  $-x+2, -y+1, -z$ ; #9  $-x+1, -y+3, -z+1$ ; #10  $x, y+1, z$ ; #11  $-x+3, -y, -z$ ; #12  $-x+2, -y+3, -z+1$ ; #13  $-x+2, -y+2, -z+1$ ; #14  $x+1, y-1, z$ ; #15  $x+1, y+1, z$ .

**Table S3** Atomic coordinates ( $\times 10^4$ ), equivalent isotropic displacement parameters ( $\text{\AA}^2 \times 10^3$ ), SOFs and atomic sites for **1** and **2**.  $U(\text{eq})$  is defined as one third of the trace of the orthogonalized  $U^{ij}$  tensor.

| Compounds         | Atom      | $x$         | $y$         | $z$          | $U(\text{eq})$ | SOF      | site |
|-------------------|-----------|-------------|-------------|--------------|----------------|----------|------|
| Compound <b>1</b> | Ga1       | 0.59169(12) | 0.09369(2)  | 0.24859(13)  | 0.0232(3)      | 0.658(4) | 4e   |
|                   | Ga2       | 0.39997(18) | 0.17859(3)  | 0.25484(19)  | 0.0223(4)      | 0.234(4) | 4e   |
|                   | Ga3       | 0.61040(17) | 0.24121(3)  | -0.05578(17) | 0.0230(4)      | 0.326(4) | 4e   |
|                   | Ga4       | 0.9167(2)   | 0.03527(3)  | 0.4805(2)    | 0.0240(5)      | 0.153(4) | 4e   |
|                   | Ga5       | 0.0922(2)   | 0.10365(3)  | 0.2026(2)    | 0.0242(5)      | 0.129(4) | 4e   |
|                   | Si1       | 0.59169(12) | 0.09369(2)  | 0.24859(13)  | 0.0232(3)      | 0.342(4) | 4e   |
|                   | Si2       | 0.39997(18) | 0.17859(3)  | 0.25484(19)  | 0.0223(4)      | 0.766(4) | 4e   |
|                   | Si3       | 0.61040(17) | 0.24121(3)  | -0.05578(17) | 0.0230(4)      | 0.674(4) | 4e   |
|                   | Si4       | 0.9167(2)   | 0.03527(3)  | 0.4805(2)    | 0.0240(5)      | 0.847(4) | 4e   |
|                   | Si5       | 0.0922(2)   | 0.10365(3)  | 0.2026(2)    | 0.0242(5)      | 0.871(4) | 4e   |
|                   | S1        | 0.3390(2)   | 0.08643(4)  | 0.0277(3)    | 0.0304(4)      | 1        | 4e   |
|                   | S2        | 0.8369(2)   | 0.08851(4)  | 0.0261(3)    | 0.0321(4)      | 1        | 4e   |
|                   | S3        | 0.5708(2)   | 0.14210(4)  | 0.4425(3)    | 0.0327(4)      | 1        | 4e   |
|                   | S4        | 0.6022(2)   | 0.04548(4)  | 0.4551(3)    | 0.0366(4)      | 1        | 4e   |
|                   | S5        | 0.3367(3)   | 0.22774(4)  | 0.4183(3)    | 0.0323(4)      | 1        | 4e   |
|                   | S6        | 0.0842(2)   | 0.16203(4)  | 0.2253(3)    | 0.0315(4)      | 1        | 4e   |
|                   | S7        | 0.5197(3)   | 0.18439(4)  | -0.0435(3)   | 0.0341(4)      | 1        | 4e   |
|                   | S8        | 0.8128(3)   | 0.24557(5)  | -0.3067(3)   | 0.0345(4)      | 1        | 4e   |
|                   | S9        | 0.9742(3)   | 0.00235(4)  | 0.7438(3)    | 0.0342(4)      | 1        | 4e   |
|                   | S10       | 0.0935(3)   | 0.08377(4)  | 0.5070(3)    | 0.0321(4)      | 1        | 4e   |
| K1                | 0.5       | 0           | 0           | 0.1081(14)   | 1              | 2b       |      |
| K2                | 0.0200(4) | 0.16486(6)  | 0.7269(3)   | 0.0819(8)    | 1              | 4e       |      |
| Compound <b>2</b> | Zn1       | 0.34302(11) | 0.70167(12) | 0.25836(5)   | 0.0196(2)      | 1        | 2i   |
|                   | Si1       | 0.8582(3)   | 0.6620(3)   | 0.25616(12)  | 0.0149(4)      | 1        | 2i   |
|                   | Si2       | 0.4842(3)   | 0.9748(3)   | 0.40176(12)  | 0.0162(4)      | 1        | 2i   |
|                   | Si3       | 1.0826(3)   | 0.8432(3)   | 0.05951(12)  | 0.0190(4)      | 1        | 2i   |
|                   | S1        | 0.6609(2)   | 0.5102(3)   | 0.29753(12)  | 0.0203(4)      | 1        | 2i   |
|                   | S2        | 0.1325(2)   | 0.5236(3)   | 0.31241(12)  | 0.0205(4)      | 1        | 2i   |
|                   | S3        | 0.2204(3)   | 0.9846(3)   | 0.34967(13)  | 0.0245(4)      | 1        | 2i   |
|                   | S4        | 0.3771(3)   | 0.7560(3)   | 0.09496(13)  | 0.0293(4)      | 1        | 2i   |
|                   | S5        | 0.7341(3)   | 0.9628(3)   | 0.29570(12)  | 0.0238(4)      | 1        | 2i   |
|                   | S6        | 0.9113(3)   | 0.6597(3)   | 0.10313(11)  | 0.0210(4)      | 1        | 2i   |
|                   | S7        | 0.4231(3)   | 1.2281(2)   | 0.48575(11)  | 0.0200(4)      | 1        | 2i   |
|                   | S8        | 0.9084(3)   | 1.1408(3)   | 0.09196(12)  | 0.0234(4)      | 1        | 2i   |
|                   | K1        | 1.3642(4)   | 0.2273(4)   | 0.12895(16)  | 0.0567(6)      | 1        | 2i   |
|                   | K2        | 0.8737(3)   | 1.3055(3)   | 0.47565(12)  | 0.0303(4)      | 1        | 2i   |

#### 4. Thermal stability

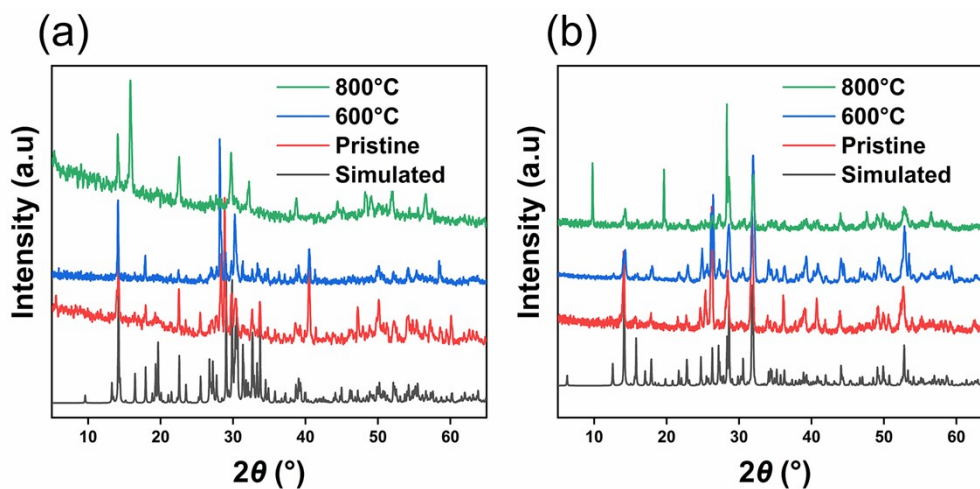

**Figure S5** PXRD patterns for **1** (a) and **2** (b) including those for the pristine and the samples after TG tests up to 600 or 800 °C. The simulated PXRD patterns for **1** and **2** are presented at the bottom of each figure for comparison, respectively.

#### 5. Band gap

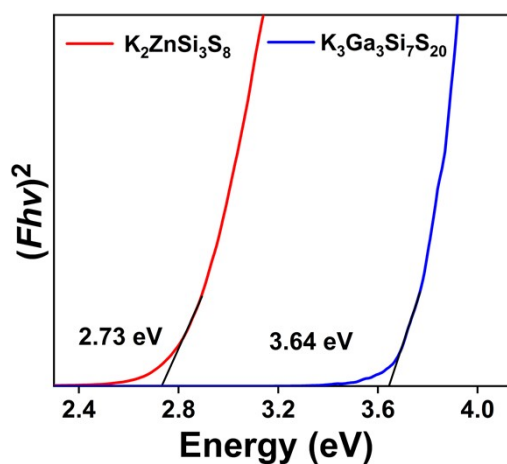

**Figure S6** Tauc plots for **1** and **2**.

#### 6. Density functional theory (DFT) calculation

The first-principles calculations were performed using the Vienna Ab-initio Simulation Package (VASP).<sup>1,2</sup> The Perdew–Burke–Ernzerhof (PBE) version of the generalized gradient approximation (GGA) was used to describe the exchange correlation functional, and the projector augmented wave (PAW) method was used in the present work. Here the cutoff energy of plane wave was chosen at 450 eV. The relaxation of geometry optimization and static self-consistent-field calculation were performed until the total energy change was within



$10^{-5}$  eV/atom and the Hellmann–Feynman force on all atomic sites was  $< 0.01$  eV/Å.

1. J. P. Perdew, K. Burke and M. Ernzerhof, *Phys. Rev. Lett.*, 1996, **77**, 3865-3868.
2. G. Kresse and J. Furthmuller, *Phys. Rev. B*, 1996, **54**, 11169-11186.
